# Supplementary material
Source: PubMed Central journal article supplement (PMC1764655)
Supplement: straninf_81_2_103__1.pdf [file straninf_81_2_103__1.pdf]

|                                |                              |                                                  |                                                            |  |         |                      |  |  |  |               |           |
|--------------------------------|------------------------------|--------------------------------------------------|------------------------------------------------------------|--|---------|----------------------|--|--|--|---------------|-----------|
|                                | 1994                         |                                                  |                                                            |  | F/<br>M | 15-≥45               |  |  |  | 108/250       | 47.2/15.2 |
|                                |                              |                                                  |                                                            |  |         |                      |  |  |  |               |           |
|                                | 1991,<br>1992<br>and<br>1994 | Individuals at low risk of<br>HIV infection      | Western blot                                               |  | F+<br>M | 15-≥45               |  |  |  | 766           | 13.6      |
|                                |                              |                                                  |                                                            |  | F/<br>M | 15-≥45               |  |  |  | 287/479       | 17.1/11.5 |
|                                |                              |                                                  |                                                            |  |         |                      |  |  |  |               |           |
| Tanzania, Dar es<br>Salaam [8] | Pre-<br>2002                 | STI clinic attendees with<br>genital ulcers      | HSV-2-specific<br>branched synthetic<br>oligopeptide assay |  | F+<br>M | Mean 29.7; median 28 |  |  |  | 70            | 78.6      |
|                                |                              |                                                  |                                                            |  | F/<br>M | Mean 29.7; median 28 |  |  |  | 19/51         | 84.2/76.5 |
|                                |                              |                                                  |                                                            |  |         |                      |  |  |  |               |           |
| Tanzania, Moshi<br>[9]         | 2000                         | Bar and hotel workers                            | Type-specific EIA<br>(ELISA; Meridian<br>Diagnostics)      |  | F+<br>M | 29.5 (16-66)         |  |  |  | 515           | 43.5      |
|                                |                              |                                                  |                                                            |  | F/<br>M | 29.5 (16-66)         |  |  |  | 309/206       | 53.1/29.1 |
|                                |                              |                                                  |                                                            |  | F       | 16-20                |  |  |  | 42            | 33.3      |
|                                |                              |                                                  |                                                            |  |         | 21-25                |  |  |  | 113           | 45.1      |
|                                |                              |                                                  |                                                            |  |         | 26-30                |  |  |  | 71            | 59.2      |
|                                |                              |                                                  |                                                            |  |         | 31-35                |  |  |  | 32            | 65.6      |
|                                |                              |                                                  |                                                            |  |         | ≥36                  |  |  |  | 51            | 70.6      |
|                                |                              |                                                  |                                                            |  | M       | 16-25                |  |  |  | 63            | 14.3      |
|                                |                              |                                                  |                                                            |  |         | 26-30                |  |  |  | 49            | 26.5      |
|                                |                              |                                                  |                                                            |  |         | 31-35                |  |  |  | 34            | 32.4      |
|                                |                              |                                                  |                                                            |  |         | ≥36                  |  |  |  | 60            | 45.0      |
|                                |                              |                                                  |                                                            |  |         |                      |  |  |  |               |           |
| Tanzania, Moshi<br>[10]        | 1999                         | Primary health clinic<br>attendees               | Type-specific ELISA<br>(Gull)                              |  | F       | 27 (16-46)           |  |  |  | 378           | 39.4      |
|                                |                              |                                                  |                                                            |  |         | 15-19                |  |  |  | 35            | 22.9      |
|                                |                              |                                                  |                                                            |  |         | 20-29                |  |  |  | 234           | 36.8      |
|                                |                              |                                                  |                                                            |  |         | 30-49                |  |  |  | 113           | 48.7      |
|                                |                              |                                                  |                                                            |  |         |                      |  |  |  |               |           |
| Uganda [5]                     | Pre-<br>2002                 | HIV-negative family<br>planning clinic attendees | Western blot                                               |  | F       | 18-35                |  |  |  | 176           | 61.9      |
| Uganda, Masaka<br>[11]         | 1994-<br>2000                | General population                               | Type-specific EIA                                          |  | F+<br>M | 13-29                |  |  |  | 7032          | 27.7      |
|                                |                              |                                                  |                                                            |  | F/<br>M | 13-29                |  |  |  | 3818/32<br>14 | 37.7/15.8 |

|                                              |           |                                                                      |                                          |         |                                |  |  |         |         |
|----------------------------------------------|-----------|----------------------------------------------------------------------|------------------------------------------|---------|--------------------------------|--|--|---------|---------|
| Zimbabwe, Harare [5]                         | Pre-2002  | HIV-negative STI clinic attendees                                    | Western blot                             | F       | 18-35                          |  |  | 173     | 66.5    |
| Zimbabwe, Harare [12]                        | 1999-2000 | Primary health clinic attendees                                      | Type-specific ELISA (Gull)               | F       | 25 (6-49)                      |  |  | 389     | 42.2    |
|                                              |           |                                                                      |                                          |         | <20                            |  |  | 44      | 27.3    |
|                                              |           |                                                                      |                                          |         | 20-25                          |  |  | 169     | 36.7    |
|                                              |           |                                                                      |                                          |         | >26                            |  |  | 180     | 50.0    |
| <b>Central and South America</b>             |           |                                                                      |                                          |         |                                |  |  |         |         |
| Jamaica, Kingston [13]                       | 1993-1997 | CIN-1 patients                                                       | Type-specific ELISA (Focus Technologies) | F       | 31.2                           |  |  | 201     | 60.9    |
| Mexico, Chiapas state, Soconusco region [14] | 1998      | Commercial sex workers                                               | Western blot                             | F       | Mean 25.6; median 23.7 (15-47) |  |  | 460     | 85.7    |
| Mexico, Morelos state [15]                   | 2000      | Sexually-active students                                             | Western blot                             | F+<br>M | ≤15-≥18                        |  |  | 898     | 5.7     |
|                                              |           |                                                                      |                                          | E/<br>M | 17.5/18.1 (11-24)              |  |  | 381/517 | 7.9/4.1 |
|                                              |           |                                                                      |                                          | F+<br>M | ≤15                            |  |  | 204     | 7.4     |
|                                              |           |                                                                      |                                          |         | 16-17                          |  |  | 205     | 4.9     |
|                                              |           |                                                                      |                                          |         | ≥18                            |  |  | 489     | 5.3     |
|                                              |           |                                                                      |                                          | F       | ≤15                            |  |  | 91      | 9.9     |
|                                              |           |                                                                      |                                          |         | 16-17                          |  |  | 98      | 6.1     |
|                                              |           |                                                                      |                                          |         | ≥18                            |  |  | 192     | 7.8     |
|                                              |           |                                                                      |                                          | M       | ≤15                            |  |  | 113     | 5.3     |
|                                              |           |                                                                      |                                          |         | 16-17                          |  |  | 107     | 3.7     |
|                                              |           |                                                                      |                                          |         | ≥18                            |  |  | 297     | 3.7     |
| Peru [17]                                    | Pre-2002  | Hospital-based controls in a study of cervical cancer matched by age | Western blot                             | F       | 52 (28-68)                     |  |  | 171     | 35.7    |
| South America [18]                           | Pre-2002  | Village children                                                     | Type-specific immunodot enzyme assay     | F+<br>M | 1-13                           |  |  | 201     | 71      |
|                                              |           |                                                                      |                                          |         | 0-3                            |  |  | 23      | 29      |



|                             |                                 |                          |                             |   |                                  |     |      |     |      |
|-----------------------------|---------------------------------|--------------------------|-----------------------------|---|----------------------------------|-----|------|-----|------|
|                             |                                 |                          |                             |   | Not under prenatal care<br>15-16 | 75  | 32.0 | 75  | 0.0  |
|                             |                                 |                          |                             |   | Not under prenatal care<br>17-18 | 90  | 28.9 | 90  | 5.6  |
|                             |                                 |                          |                             |   | Not under prenatal care<br>19-20 | 89  | 43.8 | 89  | 2.2  |
|                             |                                 |                          |                             |   | Not under prenatal care<br>21-22 | 95  | 53.7 | 95  | 4.2  |
|                             |                                 |                          |                             |   | Not under prenatal care<br>23-24 | 92  | 57.5 | 92  | 1.1  |
|                             |                                 |                          |                             |   | Not under prenatal care<br>25-29 | 48  | 43.8 | 48  | 4.2  |
|                             |                                 |                          |                             |   | Not under prenatal care<br>30-34 | 52  | 71.2 | 52  | 13.5 |
|                             |                                 |                          |                             |   | Not under prenatal care<br>35-39 | 44  | 75.0 | 44  | 15.9 |
|                             |                                 |                          |                             |   | Not under prenatal care<br>40-44 | 53  | 88.7 | 53  | 18.9 |
|                             |                                 |                          |                             | M | 15-16                            | 104 | 26.9 | 104 | 3.8  |
|                             |                                 |                          |                             |   | 17-18                            | 126 | 27.0 | 126 | 3.2  |
|                             |                                 |                          |                             |   | 19-20                            | 132 | 37.1 | 132 | 6.1  |
|                             |                                 |                          |                             |   | 21-22                            | 135 | 28.1 | 135 | 1.5  |
|                             |                                 |                          |                             |   | 23-24                            | 141 | 43.3 | 141 | 0.7  |
|                             |                                 |                          |                             |   | 25-29                            | 89  | 44.9 | 89  | 6.7  |
|                             |                                 |                          |                             |   | 30-34                            | 92  | 63.0 | 92  | 9.8  |
|                             |                                 |                          |                             |   | 35-39                            | 85  | 55.3 | 85  | 5.9  |
|                             |                                 |                          |                             |   | 40-44                            | 75  | 54.7 | 75  | 21.3 |
| USA, various<br>cities [24] | 1993-<br>1994,<br>1995-<br>1997 | HIV-positive homosexuals | Western blot                | M | 30.5 (19-54)                     | 116 | 64.7 | 116 | 41.4 |
|                             |                                 | HIV-negative homosexuals | Western blot                | M | 31 (18-61)                       | 342 | 58.8 | 342 | 31.0 |
| USA, four cities<br>[25]    | 1993-<br>1999                   | HIV-positive individuals | Type-specific<br>immunoblot | F | 16-55                            | 844 | 74.5 | 844 | 67.7 |
|                             |                                 |                          |                             |   | 16-25                            | 67  | 79.1 | 67  | 56.7 |
|                             |                                 |                          |                             |   | 26-30                            | 152 | 69.7 | 152 | 64.5 |
|                             |                                 |                          |                             |   | 31-35                            | 251 | 74.9 | 251 | 66.5 |
|                             |                                 |                          |                             |   | 36-40                            | 196 | 74.0 | 196 | 69.4 |
|                             |                                 |                          |                             |   | 41-45                            | 120 | 81.7 | 120 | 72.5 |
|                             |                                 |                          |                             |   | 46-55                            | 58  | 67.2 | 58  | 77.6 |

|                                                                   |           |                                                                 |                                          |         |              |           |      |      |           |
|-------------------------------------------------------------------|-----------|-----------------------------------------------------------------|------------------------------------------|---------|--------------|-----------|------|------|-----------|
|                                                                   |           | Demographically-matched HIV-negative individuals                | Type-specific immunoblot                 | F       | 16-55        | 423       | 74.5 | 423  | 56.7      |
|                                                                   |           |                                                                 |                                          |         | 16-25        | 48        | 62.5 | 48   | 39.6      |
|                                                                   |           |                                                                 |                                          |         | 26-30        | 84        | 77.4 | 84   | 51.2      |
|                                                                   |           |                                                                 |                                          |         | 31-35        | 98        | 73.5 | 98   | 56.1      |
|                                                                   |           |                                                                 |                                          |         | 36-40        | 106       | 82.1 | 106  | 61.3      |
|                                                                   |           |                                                                 |                                          |         | 41-45        | 53        | 67.9 | 53   | 62.3      |
|                                                                   |           |                                                                 |                                          |         | 46-55        | 34        | 73.5 | 34   | 73.5      |
|                                                                   |           |                                                                 |                                          |         |              |           |      |      |           |
| USA, Baltimore, Denver, Long Beach, Newark and San Francisco [26] | 1993-1996 | HIV-negative STI clinic attendees                               | Type-specific strip immunoblot (Chiron)  | F+<br>M | 25 (14-76)   | 4128      | 70.7 | 4128 | 40.8      |
|                                                                   |           |                                                                 |                                          | F+<br>M | 25 (14-76)   | 1780/2348 |      |      | 52.0/32.4 |
|                                                                   |           |                                                                 |                                          | F+<br>M | 14-19        | 724       |      |      | 23.6      |
|                                                                   |           |                                                                 |                                          |         | 20-24        | 1198      |      |      | 34.3      |
|                                                                   |           |                                                                 |                                          |         | 25-29        | 802       |      |      | 42.5      |
|                                                                   |           |                                                                 |                                          |         | 30-39        | 977       |      |      | 49.9      |
|                                                                   |           |                                                                 |                                          |         | ≥40          | 427       |      |      | 64.6      |
|                                                                   |           |                                                                 |                                          |         |              |           |      |      |           |
| USA, California, San Francisco [30]                               | 1997-2000 | HIV test takers                                                 | Type-specific ELISA (Focus Technologies) | F/<br>M | 32 (18-71)   | 143/844   |      |      | 23.5      |
|                                                                   |           |                                                                 |                                          | F       | 32 (18-71)   | 136       |      |      | 28.7      |
|                                                                   |           |                                                                 |                                          | M       | Heterosexual | 92        |      |      | 13.0      |
|                                                                   |           |                                                                 |                                          |         | Homosexual   | 752       |      |      | 24.1      |
|                                                                   |           |                                                                 |                                          | F+<br>M | ≤29          | 294       |      |      | 11.2      |
|                                                                   |           |                                                                 |                                          |         | 30-39        | 449       |      |      | 21.2      |
|                                                                   |           |                                                                 |                                          |         | ≥40          | 239       |      |      | 42.7      |
|                                                                   |           |                                                                 |                                          |         |              |           |      |      |           |
| USA, Pennsylvania, Pittsburgh [35]                                | 1998-2000 | Women seeking medical care requiring a gynaecologic examination | Type-specific ELISA (Focus Technologies) | F       | 18-30        | 1207      |      |      | 24.9      |
|                                                                   |           |                                                                 |                                          |         | 18-20        | 553       |      |      | 15.0      |
|                                                                   |           |                                                                 |                                          |         | 21-25        | 466       |      |      | 29.0      |
|                                                                   |           |                                                                 |                                          |         | 26-30        | 188       |      |      | 44.1      |
|                                                                   |           |                                                                 |                                          |         |              |           |      |      |           |
| USA, Texas, Lubbock and Houston [37]                              | 1998-1999 | Drug users                                                      | Type-specific assay                      | F/<br>M | <17-64       | 113/294   |      |      | 44.4      |

|                                                                       |           |                                                                                                                |                                        |         |                   |         |           |              |           |
|-----------------------------------------------------------------------|-----------|----------------------------------------------------------------------------------------------------------------|----------------------------------------|---------|-------------------|---------|-----------|--------------|-----------|
| USA, Washington, Seattle and Oregon, Portland [39]                    | Pre-2002  | Individuals with a history of genital herpes.                                                                  | Western blot                           | M       | 35 (21-73)        | 68      | 44.1      | 68           | 92.6      |
| USA, Washington, Seattle [40]                                         | Pre-2002  | Individuals with recurrent genital HSV-2 infection                                                             | Western blot                           | F/<br>M | 33.5 (20-73)      | 51/33   | 38.1      |              |           |
| USA, Washington, Seattle and Canada, British Columbia, Vancouver [41] | 1993-2000 | Pregnant women with a history of genital herpes                                                                | Type-specific assay                    | F       | 31/30 (17-45)     | 107     | 43.9      | 107          | 95.3      |
| Asia/Australia                                                        |           |                                                                                                                |                                        |         |                   |         |           |              |           |
| Australia, Melbourne [50]                                             | 1995-1996 | Individuals with no history of genital herpes and with a heterosexual partner with genital herpes due to HSV-2 | Western blot                           | F+<br>M | 18-45             | 337     | 68.5      | 337          | 33.2      |
|                                                                       |           |                                                                                                                |                                        | F/<br>M | 32/34             | 160/177 | 75.0/62.7 | 160/177      | 42.5/24.9 |
|                                                                       |           |                                                                                                                |                                        | F+<br>M | 18-25             | 44      | 63.6      | 44           | 29.5      |
|                                                                       |           |                                                                                                                |                                        |         | 26-30             | 88      | 59.1      | 88           | 39.8      |
|                                                                       |           |                                                                                                                |                                        |         | 31-35             | 87      | 71.3      | 87           | 28.7      |
|                                                                       |           |                                                                                                                |                                        |         | 36-40             | 64      | 75.0      | 64           | 40.6      |
|                                                                       |           |                                                                                                                |                                        |         | 41-45             | 54      | 75.9      | 54           | 24.1      |
| Bangladesh, Dhaka [53]                                                | 1998-1999 | Truck drivers and their helpers                                                                                | Type-specific ELISA (Diasorin)         | M       | 26.8              |         |           | 387          | 25.8      |
|                                                                       |           |                                                                                                                |                                        |         | 15-20             |         |           | 100          | 31        |
|                                                                       |           |                                                                                                                |                                        |         | 21-26             |         |           | 114          | 21        |
|                                                                       |           |                                                                                                                |                                        |         | 27-32             |         |           | 96           | 23        |
|                                                                       |           |                                                                                                                |                                        |         | ≥33               |         |           | 77           | 30        |
| India, Pune [54]                                                      | 1993-2000 | HIV-negative STI clinic attendees                                                                              | Type-specific EIA (Focus Technologies) | F/<br>M | <20-≥30           |         |           | 463/226<br>9 | 43.0      |
|                                                                       |           |                                                                                                                |                                        | F       | With STI: <20-≥30 |         |           | 271          | 50.9      |
|                                                                       |           |                                                                                                                |                                        |         | CSW: <20-≥30      |         |           | 192          | 89.1      |
|                                                                       |           |                                                                                                                |                                        | M       | With STI: <20-≥30 |         |           | 2260         | 38.1      |



|                                              |                      |                                    |                                            |         |            |      |      |         |           |
|----------------------------------------------|----------------------|------------------------------------|--------------------------------------------|---------|------------|------|------|---------|-----------|
|                                              | 2002                 | study of cervical cancer           |                                            |         |            |      |      |         |           |
| Thailand, Lampang and Songkla provinces [59] | 1997-1998; 1999-2000 | General population                 | Type-specific ELISA (Focus Technologies)   | F       | <25-≥65    |      |      | 1703    | 30.8      |
| <b>Europe/Middle East</b>                    |                      |                                    |                                            |         |            |      |      |         |           |
| Denmark [60]                                 | Pre-2002             | Prisoners                          | Type-specific assay (Gull)                 | M       | 30         |      |      | 328     | 17.7      |
|                                              |                      | Drug users                         | Type-specific assay (Gull)                 | F/<br>M | 37         |      |      | 48/89   | 32.8      |
| France [64]                                  | 1996                 | General population                 | Type-specific EIA (Gull)                   | F+<br>M | 35->55     | 4412 | 67   | 4412    | 17.2      |
|                                              |                      |                                    |                                            | F       | 35->55     |      | 65.0 |         | 17.9      |
|                                              |                      |                                    |                                            | M       | 45->55     |      | 66.4 |         | 13.7      |
|                                              |                      |                                    |                                            | F       | 35-40      |      | 58.3 |         | 15.7      |
|                                              |                      |                                    |                                            |         | 40-45      |      | 59.2 |         | 18.8      |
|                                              |                      |                                    |                                            |         | 45-50      |      | 66.4 |         | 18.1      |
|                                              |                      |                                    |                                            |         | 50-55      |      | 68.5 |         | 17.0      |
|                                              |                      |                                    |                                            |         | >55        |      | 74.7 |         | 19.5      |
|                                              |                      |                                    |                                            | M       | 45-50      |      | 64.5 |         | 12.5      |
|                                              |                      |                                    |                                            |         | 50-55      |      | 64.6 |         | 14.2      |
|                                              |                      |                                    |                                            |         | >55        |      | 70.9 |         | 15.0      |
| Italy, various sites [68]                    | 1983-1995            | AIDS-free HIV-positive individuals | Type-specific ELISA (Gull/Meridian)        | F+<br>M | 28 (16-66) |      |      | 380     | 33.2      |
|                                              |                      |                                    |                                            | F/<br>M | 28 (16-66) |      |      | 86/294  | 17.4/37.8 |
| Italy, Milan [69]                            | 1997-1998            | HIV-negative STI clinic attendees  | Type-specific ELISA (Meridian Diagnostics) | F+<br>M | 31 (16-78) |      |      | 776     | 29.5      |
|                                              |                      |                                    |                                            | F/<br>M | 31 (16-78) |      |      | 229/547 | 27.5/30.3 |
|                                              |                      |                                    |                                            | F+<br>M | <40        |      |      | 594     | 23.7      |
|                                              |                      |                                    |                                            |         | ≥40        |      |      | 182     | 48.4      |
|                                              |                      |                                    |                                            | F       | <25        |      |      | 70      | 15.7      |
