# Supplementary material
Source: PubMed Central journal article supplement (PMC1764655)
Supplement: straninf_81_2_103__2.pdf [file straninf_81_2_103__2.pdf]

**Table 2.** Coincidence of HSV-1 and HSV-2 infection by age

| Study location, reference            | Study year | Group tested                                                      | Sex     | Mean or median age, in years (range) | N <sub>1</sub> | N <sub>0</sub> | D <sub>1</sub> | D <sub>0</sub> | Effect | 95% CI     | Type of effect | Adj. effect | 95% CI     |
|--------------------------------------|------------|-------------------------------------------------------------------|---------|--------------------------------------|----------------|----------------|----------------|----------------|--------|------------|----------------|-------------|------------|
| <b>World</b>                         |            |                                                                   |         |                                      |                |                |                |                |        |            |                |             |            |
| Australia, Canada, Italy and USA [2] | 1996-1997  | HSV-2 seronegative individuals with a partner with genital herpes | F+<br>M |                                      | 626            | 243            | 41             | 35             | 0.45   | 0.30, 0.70 | RR             |             |            |
| <b>Africa</b>                        |            |                                                                   |         |                                      |                |                |                |                |        |            |                |             |            |
| Ethiopia, Addis Ababa [3]            | 1996       | General population                                                | F+<br>M | 15-54                                | 479            | 32             | 162            | 16             | 0.51   | 0.25, 1.05 | OR             |             |            |
|                                      |            |                                                                   | F       | 28                                   | 231            | 13             | 86             | 6              | 0.69   | 0.23, 2.13 | OR             |             |            |
|                                      |            |                                                                   | M       | 25                                   | 248            | 19             | 76             | 10             | 0.40   | 0.16, 1.02 | OR             | 0.40        | 0.14, 1.19 |
| <b>Central and South America</b>     |            |                                                                   |         |                                      |                |                |                |                |        |            |                |             |            |
| Mexico, Mexico City [16]             | 1992       | Commercial sex workers                                            | F       | 16->37                               | 936            | 61             | 560            | 46             | 0.49   | 0.27, 0.88 | OR             | 0.37        | 0.19, 0.73 |
| <b>North America</b>                 |            |                                                                   |         |                                      |                |                |                |                |        |            |                |             |            |
| Canada, Ontario [19]                 | 2000-2001  | Low-risk individuals                                              | F+<br>M | 18-45                                | 116            | 115            | 100            | 60             | 1.72   | 1.23, 2.39 | OR             |             |            |
|                                      |            |                                                                   | F       | Prenatal care; 18-45                 | 436            | 265            | 44             | 26             | 1.03   | 0.62, 1.72 | OR             |             |            |
|                                      |            |                                                                   |         | No prenatal care; 18-45              | 331            | 307            | 25             | 13             | 1.85   | 0.93, 3.68 | OR             |             |            |
|                                      |            |                                                                   | M       | 18-45                                | 396            | 583            | 31             | 24             | 1.98   | 1.14, 3.43 | OR             |             |            |
| USA [20, 21]                         | 1993-1995  | HSV-2 seronegative individuals with an HSV-2 seropositive         | F+<br>M | 28 (17-79)                           | 150            | 883            | 95             | 60             | 0.98   | 0.70, 1.34 | Rate ratio     |             |            |

|                                                    |           |                                   |         |            |          |          |          |     |      |            |    |      |            |
|----------------------------------------------------|-----------|-----------------------------------|---------|------------|----------|----------|----------|-----|------|------------|----|------|------------|
|                                                    |           | partner; STI clinic attendees     |         |            |          |          |          |     |      |            |    |      |            |
| USA, various sites [22, 23]                        | 1988-1994 | General population                | F+<br>M | 12≥70      | 983<br>9 | 325<br>5 | 286<br>1 | 671 | 1.58 | 1.44, 1.74 | OR |      |            |
|                                                    |           |                                   | F       | 12≥70      | 512<br>6 | 156<br>1 | 173<br>7 | 394 | 1.52 | 1.34, 1.73 | OR |      |            |
|                                                    |           |                                   | M       | 12≥70      | 471<br>3 | 169<br>4 | 112<br>4 | 277 | 1.60 | 1.39, 1.85 | OR |      |            |
|                                                    |           |                                   | F+<br>M | 12-19      | 136<br>2 | 103<br>4 | 116<br>4 | 34  | 2.74 | 1.85, 4.05 | OR |      |            |
|                                                    |           |                                   |         | 20-29      | 194<br>9 | 801      | 419      | 162 | 1.08 | 0.88, 1.32 | OR |      |            |
|                                                    |           |                                   |         | 30-39      | 195<br>6 | 611      | 694      | 210 | 1.05 | 0.87, 1.27 | OR |      |            |
|                                                    |           |                                   |         | 40-49      | 168<br>1 | 380      | 619      | 136 | 1.05 | 0.83, 1.32 | OR |      |            |
|                                                    |           |                                   |         | 50-59      | 722      | 162      | 250      | 48  | 1.26 | 0.87, 1.82 | OR |      |            |
|                                                    |           |                                   |         | 60-69      | 928      | 141      | 366      | 50  | 1.19 | 0.82, 1.71 | OR |      |            |
|                                                    |           |                                   |         | ≥70        | 124<br>1 | 126      | 397      | 31  | 1.44 | 0.94, 2.20 | OR |      |            |
|                                                    |           |                                   |         |            |          |          |          |     |      |            |    |      |            |
| USA, four cities [25]                              | 1993-1999 | HIV-positive individuals          | F       | 16-55      | 629      | 215      | 408      | 163 | 0.59 | 0.41, 0.84 | OR |      |            |
|                                                    |           |                                   |         | 16-25      | 53       | 14       | 30       | 8   | 0.98 | 0.30, 3.21 | OR |      |            |
|                                                    |           |                                   |         | 26-30      | 106      | 46       | 66       | 32  | 0.72 | 0.34, 1.51 | OR |      |            |
|                                                    |           |                                   |         | 31-35      | 188      | 63       | 120      | 47  | 0.60 | 0.32, 1.14 | OR |      |            |
|                                                    |           |                                   |         | 36-40      | 145      | 51       | 96       | 40  | 0.54 | 0.25, 1.14 | OR |      |            |
|                                                    |           |                                   |         | 41-45      | 98       | 22       | 68       | 19  | 0.36 | 0.10, 1.30 | OR |      |            |
|                                                    |           |                                   |         | 46-55      | 39       | 19       | 28       | 17  | 0.30 | 0.06, 1.52 | OR |      |            |
|                                                    |           |                                   |         |            |          |          |          |     |      |            |    |      |            |
|                                                    |           |                                   |         |            |          |          |          |     |      |            |    |      |            |
|                                                    |           |                                   |         |            |          |          |          |     |      |            |    |      |            |
|                                                    |           |                                   |         |            |          |          |          |     |      |            |    |      |            |
|                                                    |           |                                   |         |            |          |          |          |     |      |            |    |      |            |
|                                                    |           |                                   |         |            |          |          |          |     |      |            |    |      |            |
|                                                    |           |                                   |         |            |          |          |          |     |      |            |    |      |            |
|                                                    |           |                                   |         |            |          |          |          |     |      |            |    |      |            |
|                                                    |           |                                   |         |            |          |          |          |     |      |            |    |      |            |
|                                                    |           |                                   |         |            |          |          |          |     |      |            |    |      |            |
|                                                    |           |                                   |         |            |          |          |          |     |      |            |    |      |            |
|                                                    |           |                                   |         |            |          |          |          |     |      |            |    |      |            |
|                                                    |           |                                   |         |            |          |          |          |     |      |            |    |      |            |
|                                                    |           |                                   |         |            |          |          |          |     |      |            |    |      |            |
|                                                    |           |                                   |         |            |          |          |          |     |      |            |    |      |            |
|                                                    |           |                                   |         |            |          |          |          |     |      |            |    |      |            |
|                                                    |           |                                   |         |            |          |          |          |     |      |            |    |      |            |
|                                                    |           |                                   |         |            |          |          |          |     |      |            |    |      |            |
|                                                    |           |                                   |         |            |          |          |          |     |      |            |    |      |            |
|                                                    |           |                                   |         |            |          |          |          |     |      |            |    |      |            |
|                                                    |           |                                   |         |            |          |          |          |     |      |            |    |      |            |
|                                                    |           |                                   |         |            |          |          |          |     |      |            |    |      |            |
|                                                    |           |                                   |         |            |          |          |          |     |      |            |    |      |            |
|                                                    |           |                                   |         |            |          |          |          |     |      |            |    |      |            |
|                                                    |           |                                   |         |            |          |          |          |     |      |            |    |      |            |
|                                                    |           |                                   |         |            |          |          |          |     |      |            |    |      |            |
| USA, Baltimore, Denver, Long Beach, Newark and San | 1993-1996 | HIV-negative STI clinic attendees | F+<br>M | 25 (14+76) | 291<br>8 | 121<br>0 | 122<br>6 | 459 | 1.19 | 1.03, 1.36 | OR | 0.78 | 0.66, 0.92 |



|                                          |                         |                                                          |    |       |          |          |          |          |       |             |    |  |  |  |  |
|------------------------------------------|-------------------------|----------------------------------------------------------|----|-------|----------|----------|----------|----------|-------|-------------|----|--|--|--|--|
| USA, Washington, Seattle [43]            | 1989-1995               | HIV-positive pregnant women                              | F  | 27    | 39       | 21       | 27       | 18       | 0.38  | 0.09, 1.52  | OR |  |  |  |  |
|                                          |                         |                                                          |    |       |          |          |          |          |       |             |    |  |  |  |  |
|                                          |                         | HIV-negative pregnant women                              | F  | 25    | 563<br>9 | 276<br>9 | 161<br>0 | 109<br>9 | 0.61  | 0.55, 0.67  | OR |  |  |  |  |
| USA, Washington, Seattle [44]            | 1991-1993               | Family medical clinic attendees                          | F+ | 33    | 521      | 433      | 123      | 102      | 1.00  | 0.74, 1.35  | OR |  |  |  |  |
|                                          |                         |                                                          | M  |       |          |          |          |          |       |             |    |  |  |  |  |
| USA, Washington, Seattle and Tacoma [45] | 1989-1993;<br>1990-1993 | Pregnant women                                           | F  | 25    | 556<br>6 | 297<br>2 | 149<br>2 | 939      | 0.79  | 0.72, 0.87  | OR |  |  |  |  |
|                                          |                         |                                                          |    |       |          |          |          |          |       |             |    |  |  |  |  |
|                                          |                         |                                                          |    |       |          |          |          |          |       |             |    |  |  |  |  |
|                                          |                         |                                                          |    |       |          |          |          |          |       |             |    |  |  |  |  |
| USA, Washington, Seattle [46]            | 1991-1992               | Family medical clinic attendees                          | F+ | 32.7  | 277      | 218      | 59       | 55       | 0.80  | 0.53, 1.22  | OR |  |  |  |  |
|                                          |                         |                                                          | M  |       |          |          |          |          |       |             |    |  |  |  |  |
|                                          |                         |                                                          | F  | 32.7  | 170      | 140      | 45       | 42       | 0.84  | 0.51, 1.38  | OR |  |  |  |  |
|                                          |                         |                                                          | M  | 32.7  | 107      | 78       | 14       | 13       | 0.75  | 0.33, 1.71  | OR |  |  |  |  |
| USA, Washington, Seattle [47]            | 1984-1986               | STI clinic attendees                                     | F  | 24    | 455      | 301      | 196      | 141      | 0.86  | 0.64, 1.15  | OR |  |  |  |  |
|                                          |                         |                                                          |    |       |          |          |          |          |       |             |    |  |  |  |  |
|                                          | 1984-1987               | Health clinic attendees                                  | F  | 24    | 245      | 389      | 15       | 41       | 0.55  | 0.30, 1.02  | OR |  |  |  |  |
|                                          |                         |                                                          |    |       |          |          |          |          |       |             |    |  |  |  |  |
| USA, Washington, Seattle [48]            | 1983-1986               | Homosexual STI clinic attendees                          | M  | 28/25 | 113      | 72       | 56       | 40       | 0.79  | 0.43, 1.42  | OR |  |  |  |  |
|                                          |                         |                                                          |    |       |          |          |          |          |       |             |    |  |  |  |  |
| <b>Asia/Australia</b>                    |                         |                                                          |    |       |          |          |          |          |       |             |    |  |  |  |  |
| Australia, Melbourne [49]                | 1999-2000               | HIV-positive homosexuals                                 | M  | 39.0  | 119      | 43       | 28       | 17       | 0.47  | 0.22, 0.99  | OR |  |  |  |  |
|                                          |                         |                                                          |    |       |          |          |          |          |       |             |    |  |  |  |  |
|                                          |                         | HIV-negative homosexuals                                 | M  | 36.5  | 101      | 37       | 52       | 32       | 0.17  | 0.06, 0.46  | OR |  |  |  |  |
| Australia, Melbourne [50]                | 1995-1996               | Individuals with no history of genital herpes and with a | F+ | 18-45 | 231      | 106      | 103      | 9        | 8.67  | 4.18, 18.01 | OR |  |  |  |  |
|                                          |                         |                                                          | M  |       |          |          |          |          |       |             |    |  |  |  |  |
|                                          |                         |                                                          | F  | 32    | 111      | 66       | 41       | 3        | 12.30 | 3.63,       | OR |  |  |  |  |

|                                       |           |                                    |    |           |     |    |    |    |       |              |    |  |  |
|---------------------------------------|-----------|------------------------------------|----|-----------|-----|----|----|----|-------|--------------|----|--|--|
|                                       |           | partner with HSV-2 genital herpes  | M  | 34        | 120 | 40 | 62 | 6  | 6.06  | 41.69        | OR |  |  |
|                                       |           |                                    | F+ | 18-25     | 28  | 16 | 11 | 2  | 4.53  | 0.86, 23.93  | OR |  |  |
|                                       |           |                                    | M  | 26-30     | 52  | 36 | 31 | 4  | 11.81 | 3.64, 38.35  | OR |  |  |
|                                       |           |                                    |    | 31-35     | 62  | 25 | 24 | 1  | 15.16 | 1.92, 119.48 | OR |  |  |
|                                       |           |                                    |    | 36-40     | 48  | 16 | 24 | 2  | 7.00  | 1.43, 34.19  | OR |  |  |
|                                       |           |                                    |    | 41-45     | 41  | 13 | 13 | 0  |       |              | OR |  |  |
| Australia, Sydney [51]                | 1995-1998 | Pregnant women                     | F  | 15-≥35    | 321 | 85 | 52 | 2  | 8.02  | 1.91, 33.64  | OR |  |  |
| Australia, Sydney [52]                | Pre-1993  | STI clinic attendees               | F+ | 29.3/32.2 | 76  | 31 | 29 | 14 | 0.75  | 0.32, 1.74   | OR |  |  |
|                                       |           | Pregnant women                     | F  | 25.5/26.3 | 183 | 46 | 23 | 10 | 0.52  | 0.23, 1.18   | OR |  |  |
| India, Tamil Nadu state, Chennai [55] | Pre-2003  | HIV-negative blood donors          | F+ | 16->36    | 27  | 73 | 0  | 1  | 0.00  |              | OR |  |  |
| Japan, Nagoya [57]                    | 1985-1989 | Blood donors                       | M  | 38.8      | 26  | 15 | 0  | 1  | 0.00  |              | OR |  |  |
| Japan, Osaka [57]                     | 1985-1989 | Commercial sex workers             | F  | 34.7      | 53  | 17 | 41 | 15 | 0.46  | 0.09, 2.28   | OR |  |  |
| Japan, Tokyo [57]                     | 1985-1989 | Pregnant women                     | F  | 29.1      | 45  | 45 | 1  | 5  | 0.18  | 0.02, 1.62   | OR |  |  |
| Japan, Kagoshima [57]                 | 1985-1989 | Pregnant women                     | F  | 29.9      | 144 | 56 | 29 | 3  | 4.46  | 1.30, 15.28  | OR |  |  |
| <b>Europe/Middle East</b>             |           |                                    |    |           |     |    |    |    |       |              |    |  |  |
| Denmark, Nykøbing Falster [61]        | 1988      | General population born in Denmark | F  | 20-39     | 85  | 41 | 28 | 5  | 3.54  | 1.25, 10.00  | OR |  |  |

|                                 |                      |                                    |         |                           |       |     |     |     |      |             |             |      |            |  |
|---------------------------------|----------------------|------------------------------------|---------|---------------------------|-------|-----|-----|-----|------|-------------|-------------|------|------------|--|
| Denmark, Nykøbing Falster [62]  | 1986                 | General population born in Denmark | F       | 20-39                     | 295   | 93  | 109 | 11  | 4.37 | 2.23, 8.56  | OR          |      |            |  |
|                                 |                      |                                    |         |                           | 20-24 | 57  | 34  | 17  | 0    |             |             | OR   |            |  |
|                                 |                      |                                    |         |                           | 25-29 | 62  | 24  | 22  | 5    | 2.09        | 0.69, 6.37  | OR   |            |  |
|                                 |                      |                                    |         |                           | 30-34 | 75  | 18  | 33  | 4    | 2.75        | 0.83, 9.14  | OR   |            |  |
|                                 |                      |                                    |         |                           | 35-39 | 101 | 17  | 37  | 2    | 4.34        | 0.94, 20.02 | OR   |            |  |
| Finland, Helsinki [63]          | 1988-1989            | Pregnant women                     | F       | 30                        | 698   | 299 | 138 | 19  | 3.63 | 2.20, 5.99  | OR          |      |            |  |
|                                 |                      |                                    |         |                           | 560   | 280 | 2   | 3   | 0.33 | 0.06, 1.98  | RR          |      |            |  |
| France, Paris [65]              | 1994                 | STI clinic attendees               | F+<br>M | 34.6                      | 453   | 34  | 240 | 28  | 0.24 | 0.10, 0.59  | OR          |      |            |  |
| Germany [66]                    | 1996-1997            | Blood donors and hospital patients | F+      | 18-65/1-≥70               | 366   | 139 | 524 | 124 | 1.71 | 1.39, 2.10  | OR          |      |            |  |
|                                 |                      |                                    | M       |                           | 5     | 3   |     |     |      |             |             |      |            |  |
|                                 |                      |                                    | F       | 18-65/1-≥70               | 190   | 691 | 318 | 71  | 1.76 | 1.34, 2.31  | OR          |      |            |  |
|                                 |                      |                                    | M       | 18-65/1-≥70               | 176   | 702 | 206 | 53  | 1.62 | 1.18, 2.22  | OR          |      |            |  |
|                                 |                      |                                    |         |                           | 5     |     |     |     |      |             |             |      |            |  |
| Germany, Frankfurt [67]         | 1997-2001            | Low-risk hospital attendees        | F+      | 15->40                    | 302   | 944 | 504 | 137 | 1.18 | 0.96, 1.45  | OR          |      |            |  |
|                                 |                      |                                    | M       |                           | 3     |     |     |     |      |             |             |      |            |  |
|                                 |                      |                                    | F       | 15->40                    | 176   | 537 | 319 | 92  | 1.07 | 0.83, 1.38  | OR          |      |            |  |
|                                 |                      |                                    |         |                           | 4     |     |     |     |      |             |             |      |            |  |
|                                 |                      |                                    | M       | 15->40                    | 125   | 407 | 185 | 45  | 1.39 | 0.98, 1.96  | OR          |      |            |  |
|                                 |                      |                                    |         |                           | 9     |     |     |     |      |             |             |      |            |  |
|                                 |                      |                                    | F       | 15-39                     | 102   | 417 | 153 | 52  | 1.23 | 0.88, 1.72  | OR          |      |            |  |
|                                 |                      | 6                                  |         |                           |       |     |     |     |      |             |             |      |            |  |
|                                 |                      |                                    |         |                           | 736   | 120 | 165 | 40  | 0.58 | 0.38, 0.88  | OR          |      |            |  |
|                                 |                      |                                    | M       | 15-39                     | 426   | 240 | 52  | 15  | 2.09 | 1.15, 3.79  | OR          |      |            |  |
|                                 |                      |                                    |         |                           | 833   | 167 | 133 | 30  | 0.87 | 0.56, 1.34  | OR          |      |            |  |
| The Netherlands, Amsterdam [71] | 1984-1985; 1995-1997 | Homosexuals                        | M       | 27/26                     | 364   | 168 | 147 | 29  | 3.25 | 2.07, 5.10  | OR          |      |            |  |
|                                 |                      |                                    |         | 1984-1985; 27 (IQR 25-29) | 187   | 45  | 98  | 21  | 1.26 | 0.66, 2.42  | OR          | 0.76 | 0.35, 1.66 |  |
|                                 |                      |                                    |         | 1995-1997; 26 (IQR 23-28) | 177   | 123 | 49  | 8   | 5.50 | 2.50, 12.11 | OR          | 4.30 | 1.87, 9.91 |  |
| The Netherlands,                | 1998                 | STI clinic attendees               | F+      |                           | 384   | 270 | 92  | 49  | 1.42 | 0.96, 2.10  | OR          | 1.0  | 0.5, 1.8   |  |

|                         |           |                                                   |         |                                    |     |     |     |    |               |                |    |     |          |  |  |  |  |  |  |
|-------------------------|-----------|---------------------------------------------------|---------|------------------------------------|-----|-----|-----|----|---------------|----------------|----|-----|----------|--|--|--|--|--|--|
| Rotterdam [73]          |           |                                                   | M       | 31 (16-71)                         |     |     |     |    |               |                |    |     |          |  |  |  |  |  |  |
|                         | 1993-1994 | STI clinic attendees                              | F+<br>M | F: 27 (15-63);<br>M: 33/34 (17-69) | 695 | 329 | 228 | 75 | 1.65          | 1.22, 2.24     | OR | 1.1 | 0.8, 1.7 |  |  |  |  |  |  |
| Spain, Madrid [74]      | 1993-1994 | General population                                | F       | 15-45                              | 544 | 148 | 17  | 7  | 0.65          | 0.26, 1.60     | OR |     |          |  |  |  |  |  |  |
| Switzerland, Basel [75] | 1997      | General population                                | F+<br>M | 31                                 | 117 | 34  | 16  | 2  | 2.53<br>11.62 | 0.55,<br>11.62 | OR |     |          |  |  |  |  |  |  |
|                         |           |                                                   | F       | 31                                 | 71  | 18  | 11  | 2  | 1.47          | 0.29, 7.30     | OR |     |          |  |  |  |  |  |  |
|                         |           |                                                   | M       | 31                                 | 46  | 16  | 5   | 0  |               |                | OR |     |          |  |  |  |  |  |  |
| UK, Coventry [76]       | Pre-2003  | STI clinic attendees not known to be HIV-positive | F+<br>M | 28 (16-66)                         | 128 | 86  | 25  | 18 | 0.92          | 0.47, 1.81     | OR |     |          |  |  |  |  |  |  |
|                         |           |                                                   | F       | 26 (16-65)                         | 67  | 44  | 14  | 10 | 0.90          | 0.36, 2.25     | OR |     |          |  |  |  |  |  |  |
|                         |           |                                                   | M       | 31 (16-66)                         | 61  | 42  | 11  | 8  | 0.94          | 0.34, 2.57     | OR |     |          |  |  |  |  |  |  |
| UK, Middlesbrough [80]  | 1996-1997 | STI clinic attendees                              | F       | 28.0 (14-64)                       | 187 | 82  | 47  | 11 | 2.17          | 1.06, 4.43     | OR |     |          |  |  |  |  |  |  |
|                         |           | Pregnant women                                    | F       | 26.9 (14-42)                       | 108 | 90  | 9   | 7  | 1.08          | 0.38, 3.02     | OR |     |          |  |  |  |  |  |  |

Key: N<sub>i</sub>, number of HSV-1 seropositive individuals; N<sub>s</sub>, number of HSV-1 seronegative individuals; D<sub>i</sub>, number HSV-2 seropositive among HSV-1 seropositive individuals; D<sub>s</sub>, number HSV-2 seropositive among HSV-1 seronegative individuals; 95% CI, 95% confidence interval; F, female; M, male; F+M, data for females and males combined; F/M, data for females and males separately; RR, risk ratios; OR, odds ratio; STI, sexually transmitted infection; IQR, inter-quartile range.
