# Supplementary material
Source: PubMed Central journal article supplement (PMC1764655)
Supplement: straninf_81_2_103__4.pdf [file straninf_81_2_103__4.pdf]

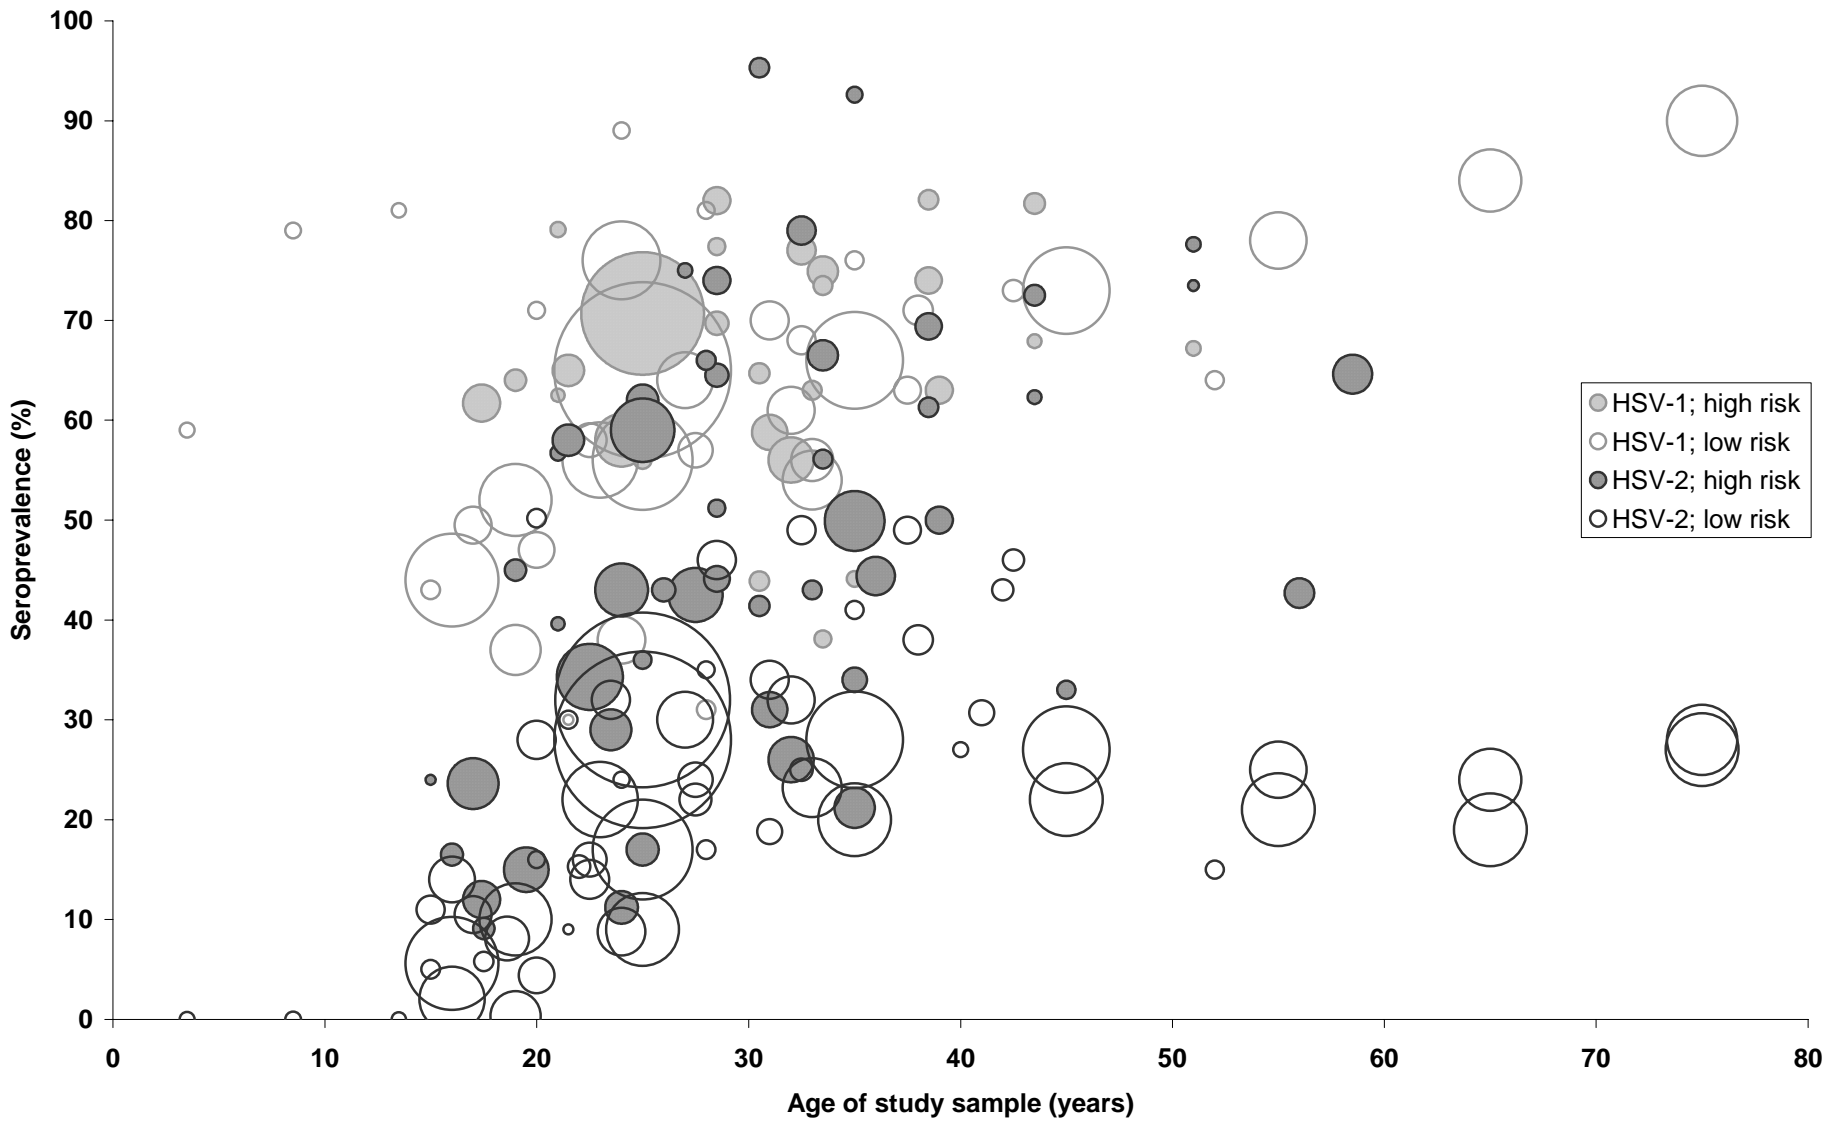

**Supplementary figure b.** Age-specific seroprevalence of HSV-1 and HSV-2 in “low-risk” and “high-risk” populations in the USA. The size of the data point is proportional to the sample size.
